# Supplementary material
Source: Springer Nature journal article supplement (http://www.springermedizin.de/resource/supplementary/12888_2009_718_MOESM2_ESM.pdf/9478276)

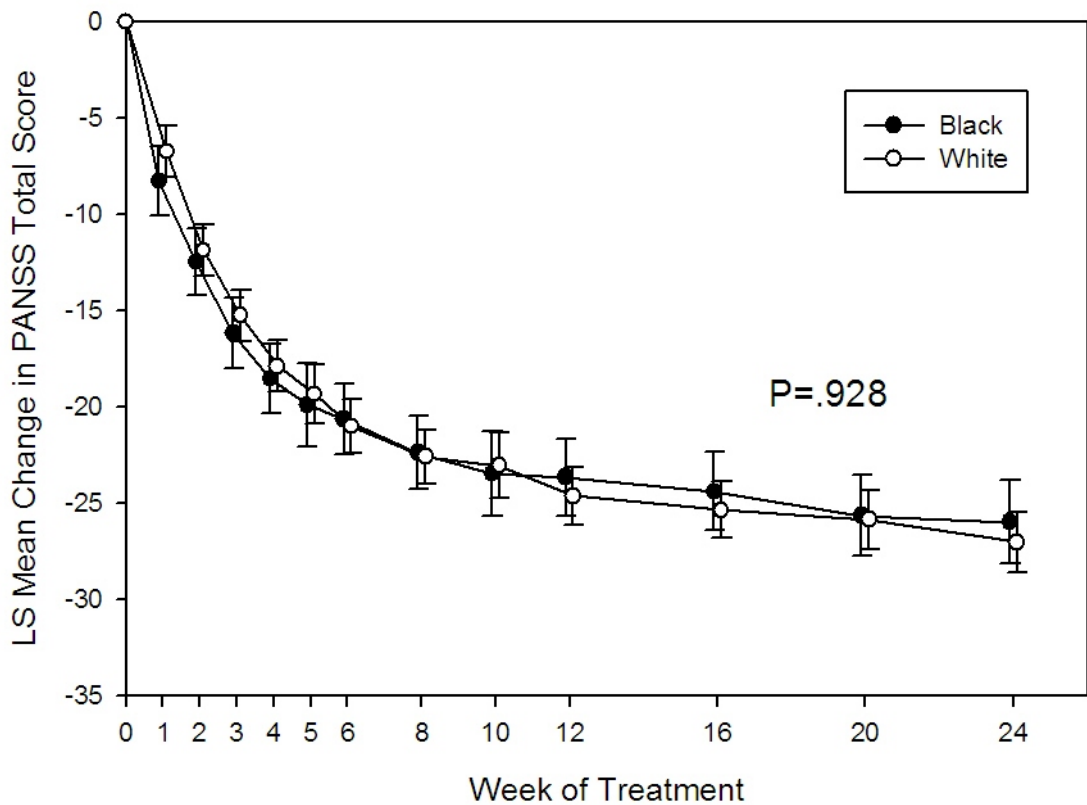

Supplement: MOESM2 [file 9478276]
